# Supplementary material for: Phosphatidylinositol-3 Kinase Inhibitors, Buparlisib and Alpelisib, Sensitize Estrogen Receptor-positive Breast Cancer Cells to Tamoxifen
Source: PubMed Central journal article supplement (PMC5574981; doi:10.1038/s41598-017-10555-z), 2017-08-29
Supplement: 41598_2017_10555_MOESM1_ESM.pdf [file 41598_2017_10555_MOESM1_ESM.pdf]

## **Supplemental Information**

### **Phosphatidylinositol-3 Kinase Inhibitors, Buparlisib and Alpelisib, Sensitize Estrogen Receptor-positive Breast Cancer Cells to Tamoxifen**

I-Chun Chen, Li-Ping Hsiao, I-Wen Huang, Huei-Chieh Yu, Ling-Chun Yeh, Ching-Hung Lin, Tom Wei-Wu Chen, Ann-Lii Cheng, and Yen-Shen Lu

Supplemental Figure 1: Median Effect Analysis and western blotting results in MCF-7 cells

MCF-7 cells were treated with (A) T + BYL, (B) T + BKM, and (C) T + everolimus for 72 hours.

Immunoblotting was performed at 3, 8, and 24 hours after control (CTL), tamoxifen (T), alpelisib (BYL), and T+BYL in (D) or buparlisib (BKM) and T+BKM in (E).

Supplemental Figure 2:

ER expression level in MCF-7 cells treated with (A) CTL, T, BYL, T + BYL or (B) CTL, T, BKM, and T + BKM at 3, 8, 24, 48, and 72 hours.

Supplemental Figure 3:

(A) Proportion of apoptotic cells in T47D cells treated with CTL, T, BYL, T+BYL, BKM, and T + BKM for 72 hours. (B) MCF-7 cells transfected with myristolyated AKT. Clones 5 and 8 were chosen for subsequent experiments. Median effect analysis for tamoxifen-resistant MCF-7 (MCF-7/TamR) treated with T + BYL (C) or T + BKM (D) for 72 hours.

Supplemental Figure 4:

(A) Knockdown efficiency of PI3K-p110  $\alpha$  and PI3K-p110  $\beta$  by different siRNAs, (1) wild type (2) siRNA-control (3) siRNA-PIK3CA and (4) siRNA-PIK3CB, in T47D cells. (B) Knockdown efficiency of PI3K-p110  $\alpha$  by (1) wild type (2) siRNA-control (3) siRNA-PIK3CA, in MCF7 cells. Median effect analysis for T+BYL in T47D cells: (C) wild type (D) siRNA-control (E) siRNA-PIK3CA (F) siRNA-PIK3CB or in MCF-7 cells: (K) wild type (L) siRNA-PIK3CA. Median effect analysis for T+BKM in T47D cells: (G) wild type (H) siRNA-control (I) siRNA-PIK3CA (J) siRNA-PIK3CB or in MCF-7 cells: (M) wild type (N) siRNA-PIK3CA. All

of the siRNA were given at 200pM according to manufacturer's manual. Both the western blotting and median effect analysis were performed after 72 hours of treatment.

Supplemental Figure 5: MTT Assay of Alpelisib or Buparlisib in Different ER Mutant MCF-7 Cells

MCF-7 cells transfected with Y537S (MCF-7/Y537S) or Y537C (MCF-7/Y537C) mutant plasmids were treated with (A) alpelisib or (B) buparlisib.

DNA sequencing analysis to confirm the presence of the mutant plasmid (TAT to AGT) in MCF7 cells (C) or ZR 75-1 cells (E). Detection of GFP under fluorescence microscopy (Leica, 200x) in MCF-7 cells (D) or ZR 75-1 cells (F)

Supplemental Figure 6: Uncropped western blot figures for Figure 2A and 2B

Uncropped original western blot figures for Figure 2A (A-C) and Figure 2B (D-F)

Supplemental Figure 7: Uncropped western blot figures for Figure 4B

The western blots that were cropped into Figure 4B were marked in blue square.

Supplemental Figure 8: Uncropped western blot figures for Supplemental Figure 1D, 1E, 2A, and 2B

Uncropped original western blot figures for Supplemental Figure 1D (A), Supplemental Figure 1E (B), Supplemental Figure 2A (C), and Supplemental Figure 2B (D)

Supplemental Figure 9: Uncropped western blot figures for Supplemental Figure 3B, 4A, and 4B

Uncropped original western blot figures for Supplemental Figure 3B (A), Supplemental Figure 4A (B), and Supplemental Figure 4B (C)

#### Supplement Table 1: Tumor Size Comparison Between Treatment Groups

Unpaired t-test was used to compare treatment effects between groups. p-value is listed in the table.

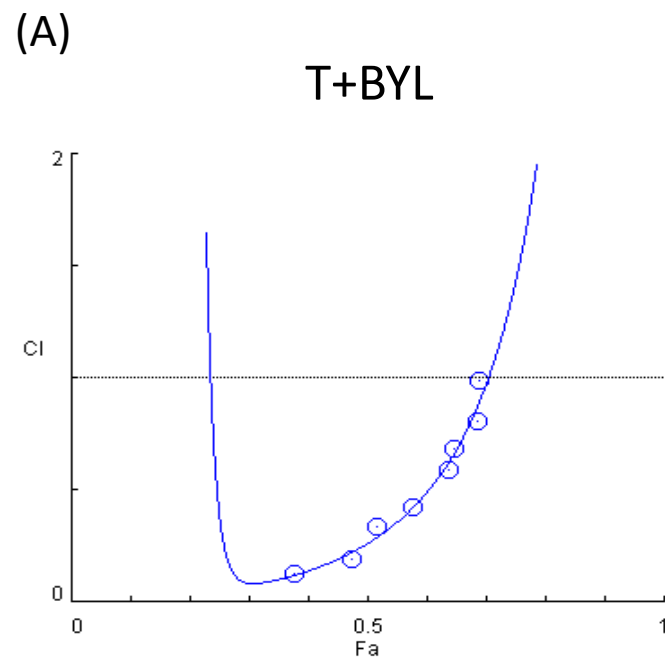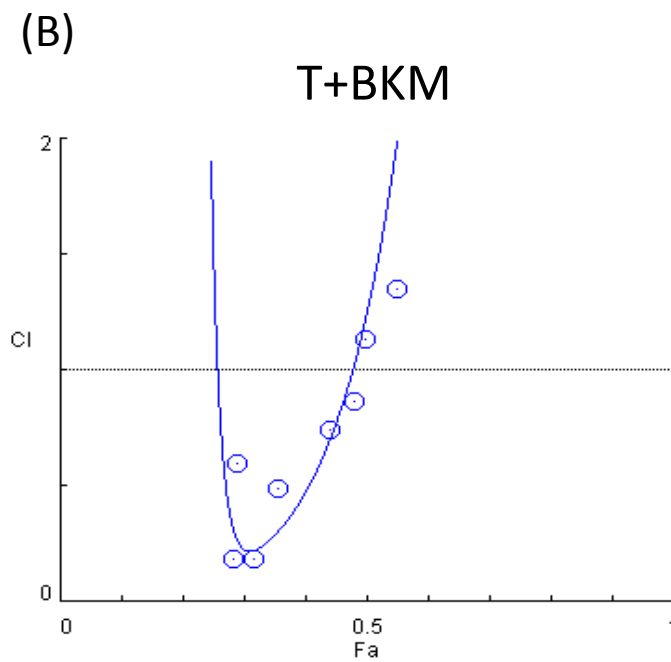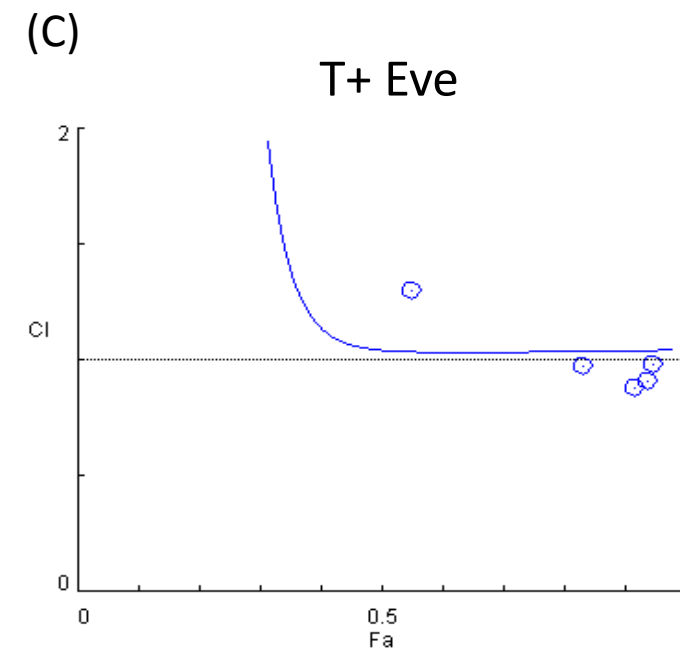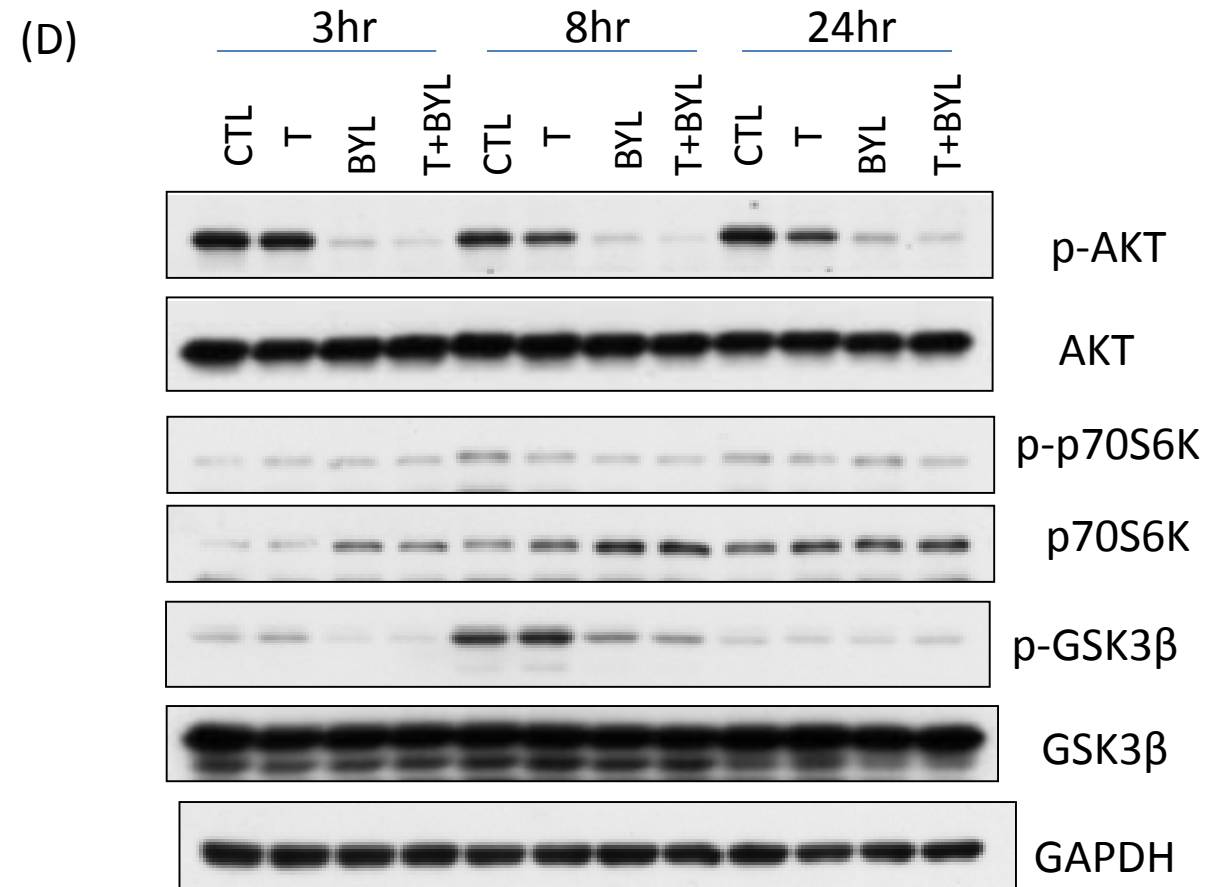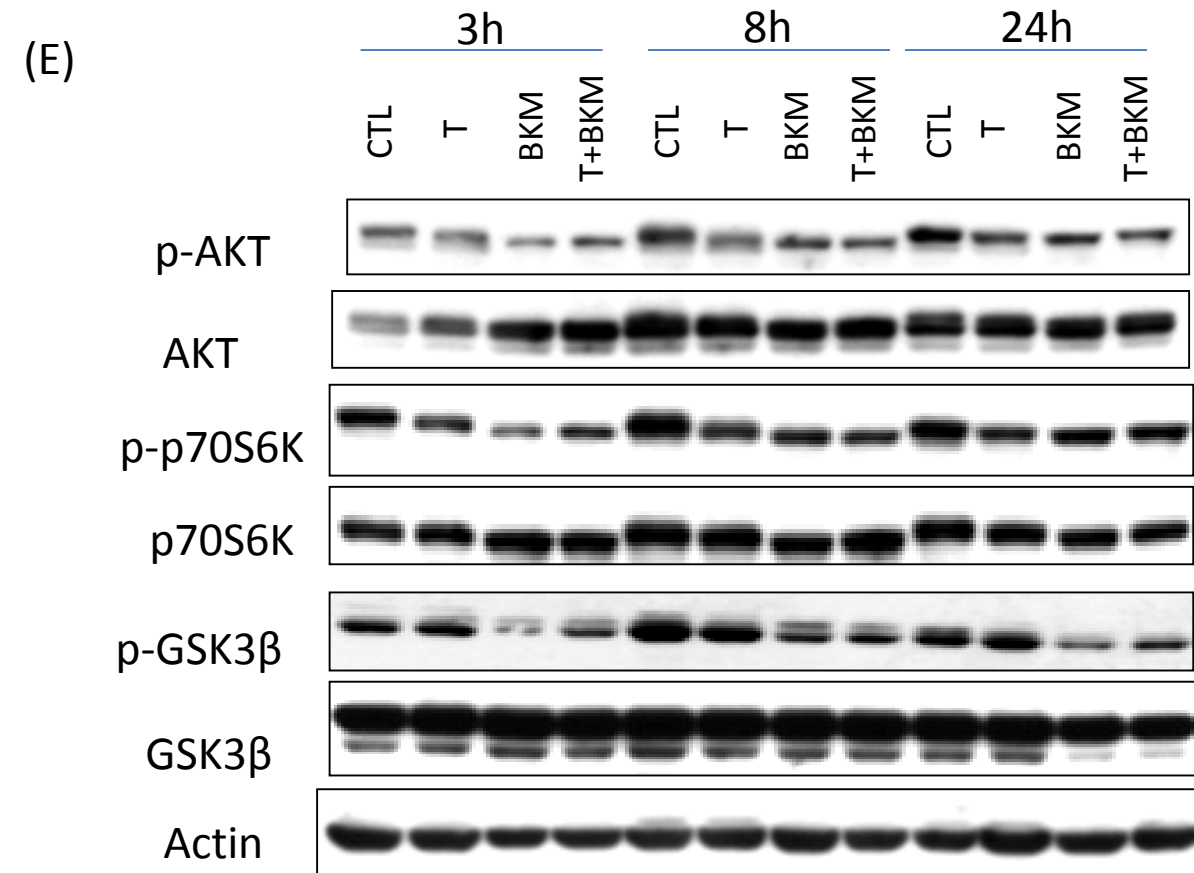

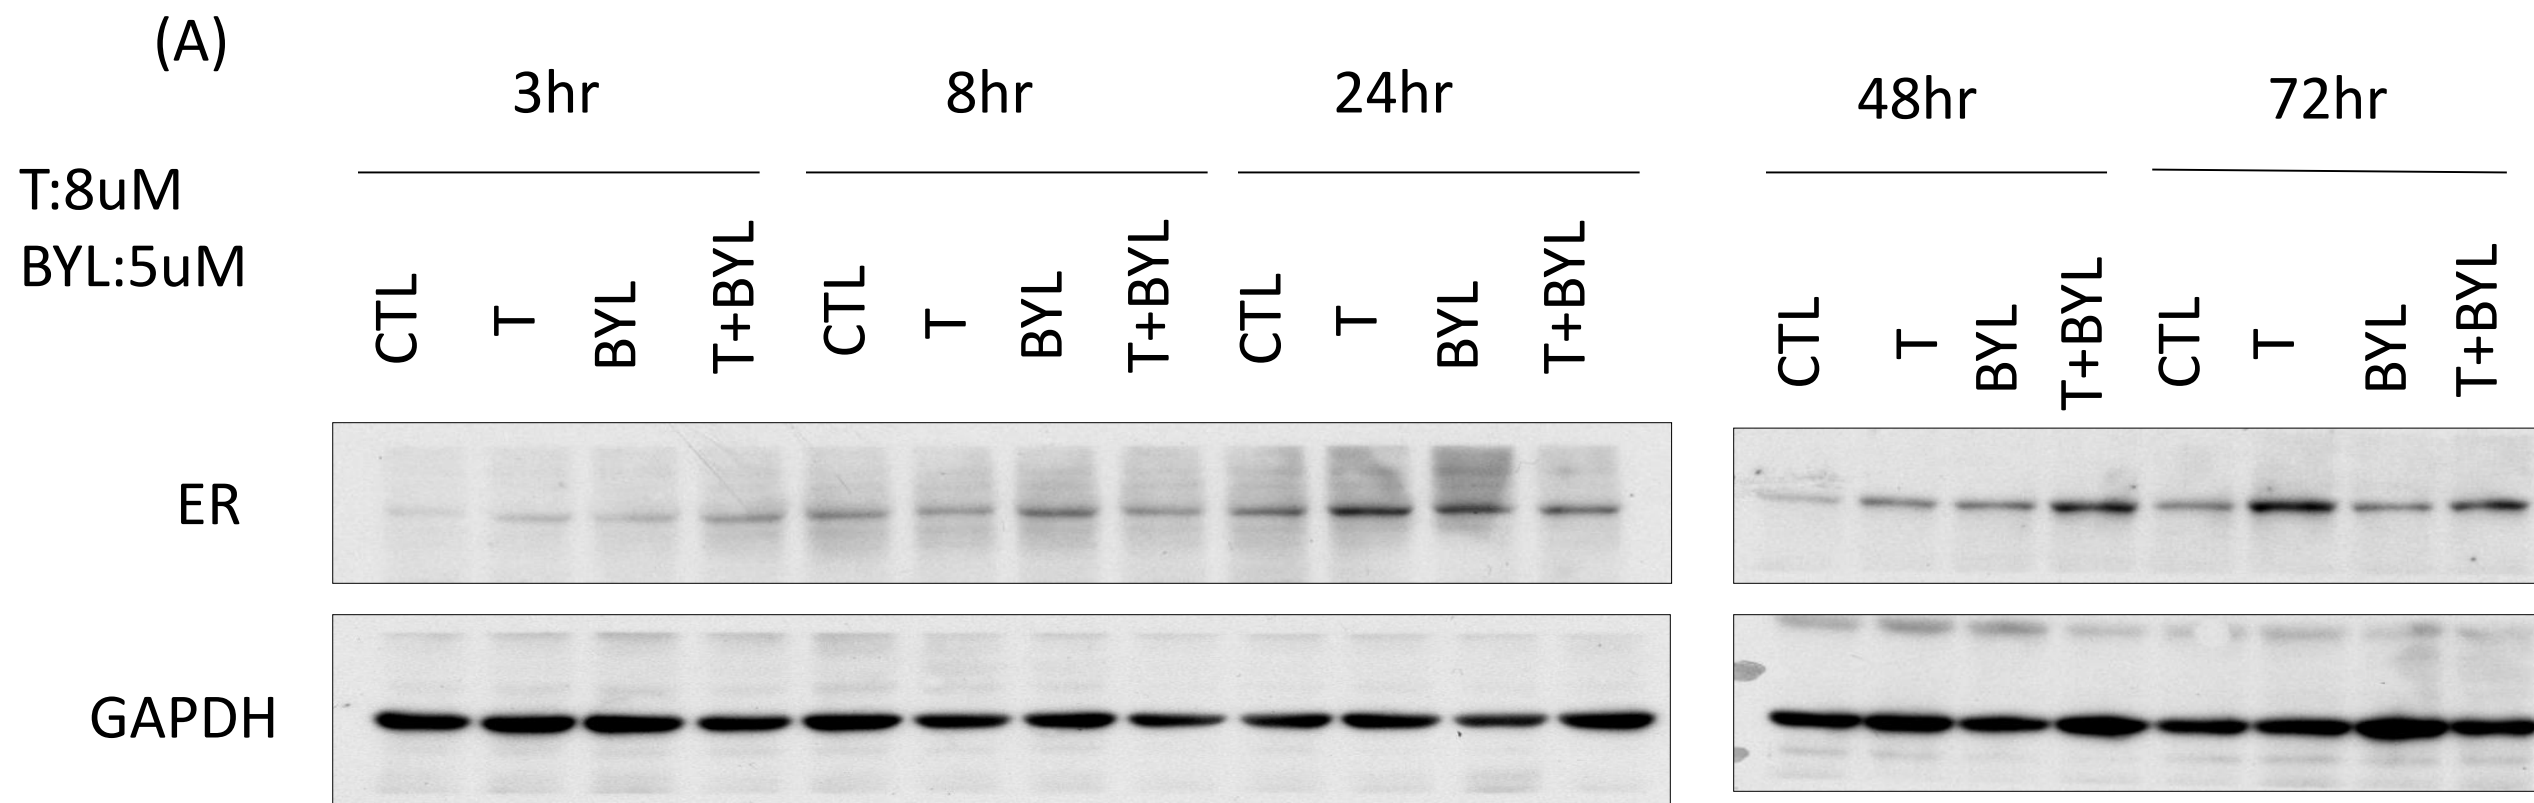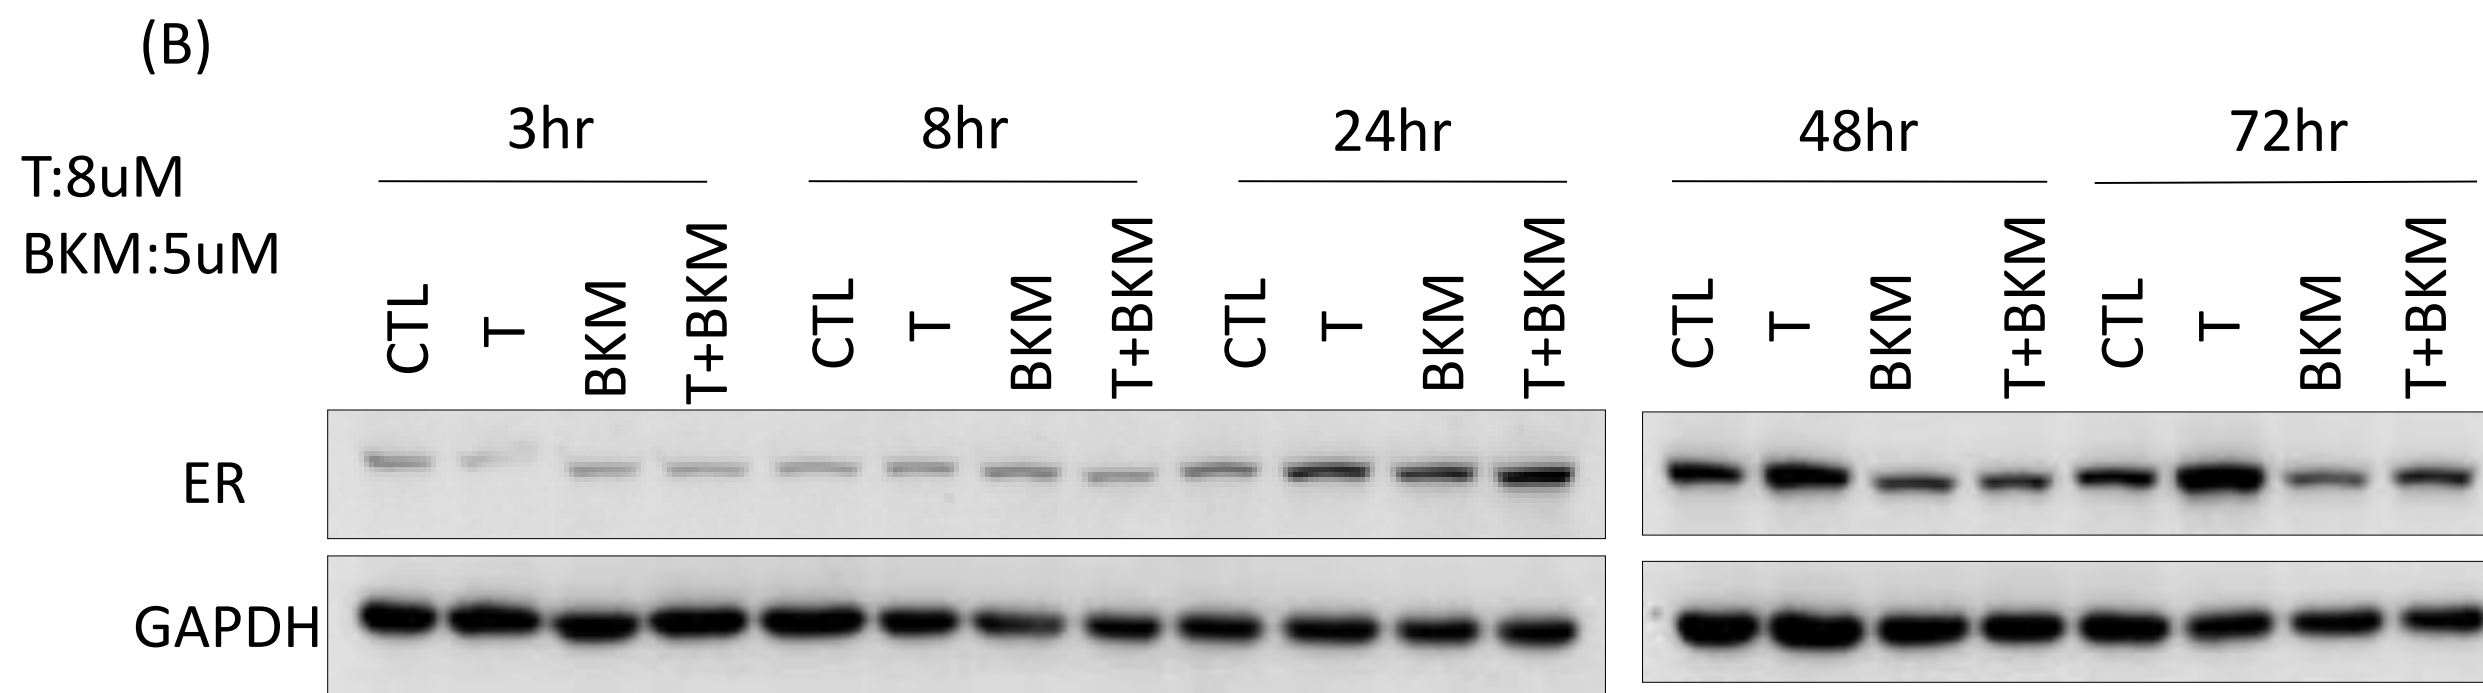

(A)

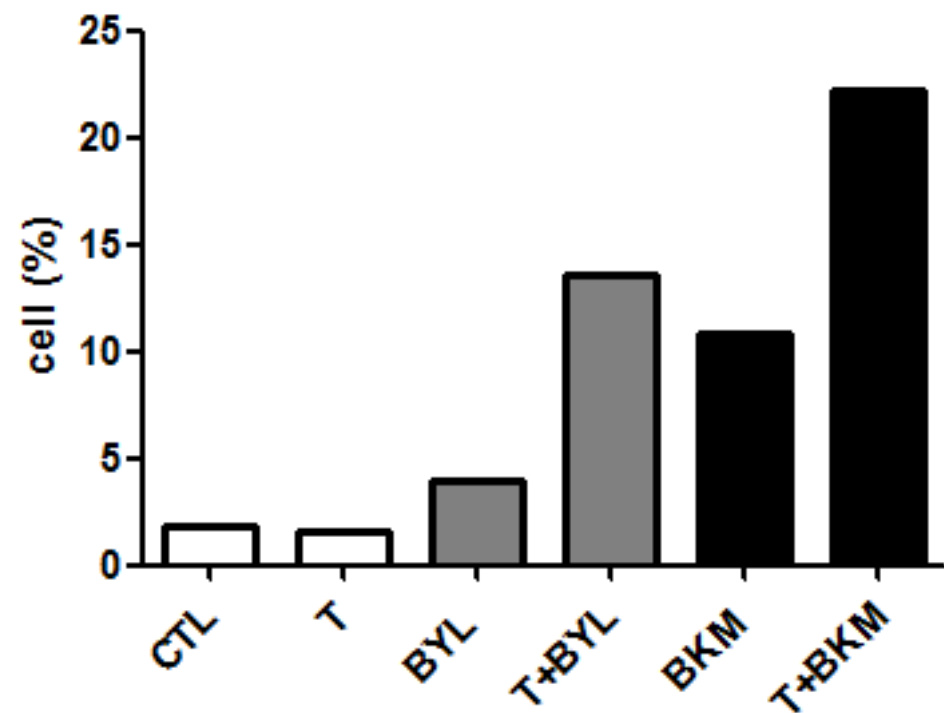

(B)

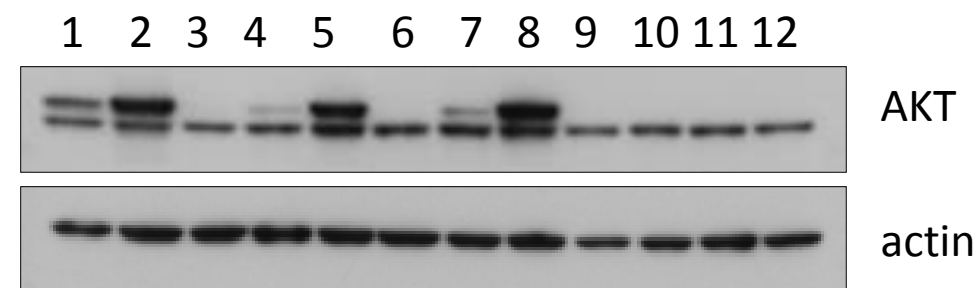

(C)

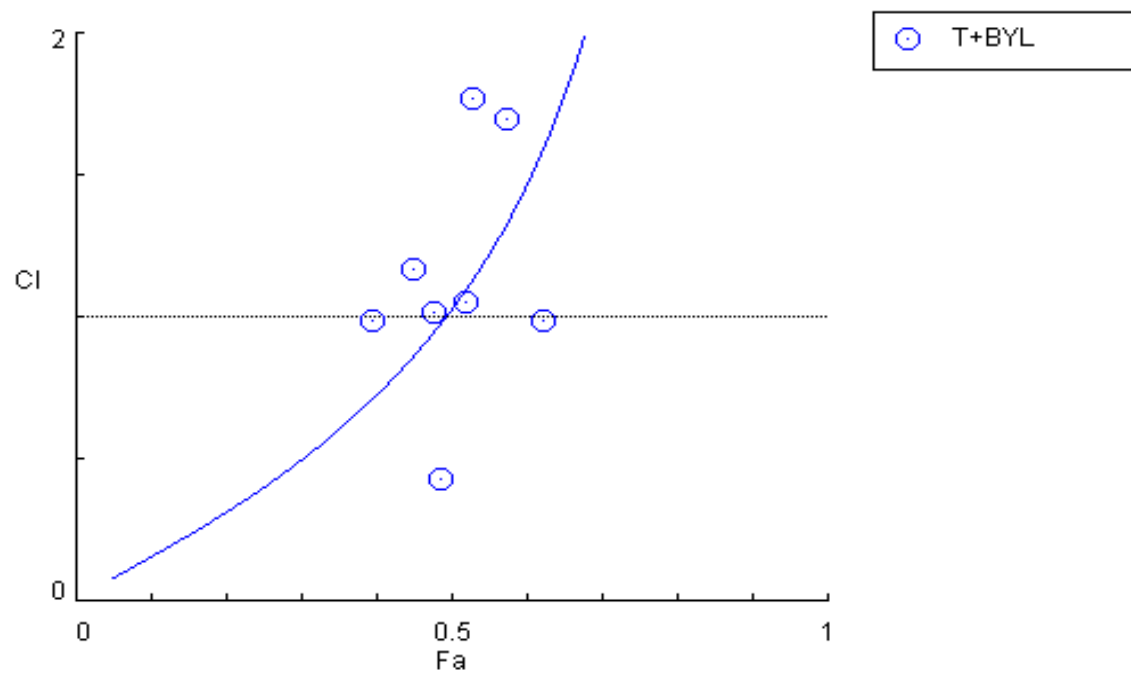

(D)

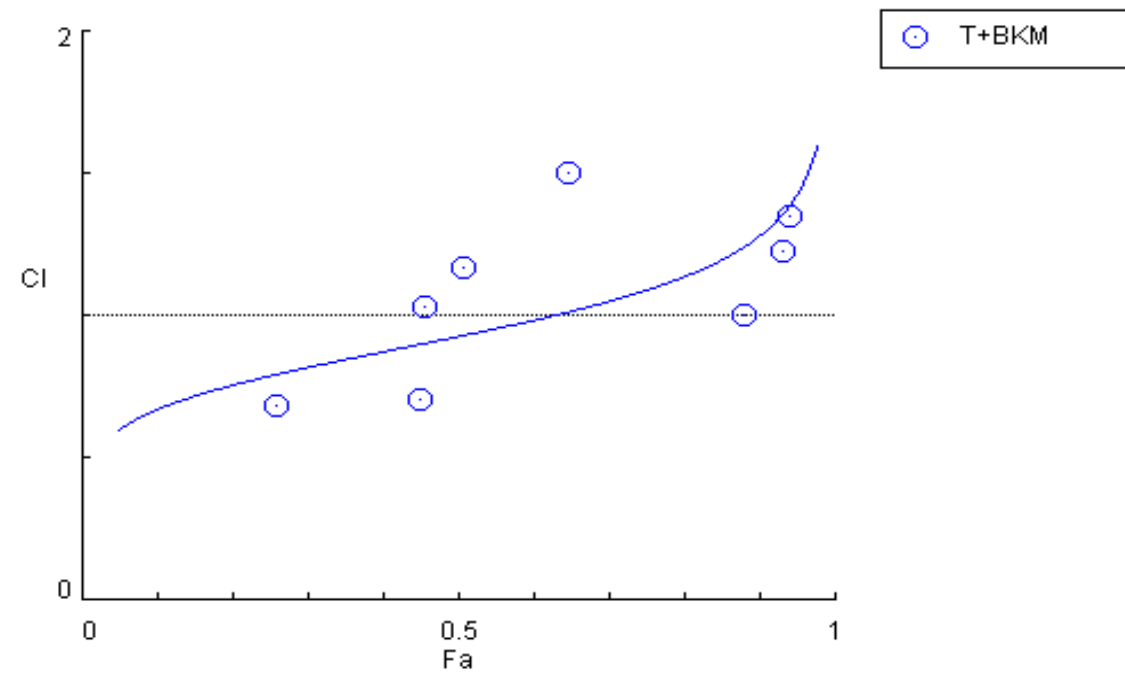

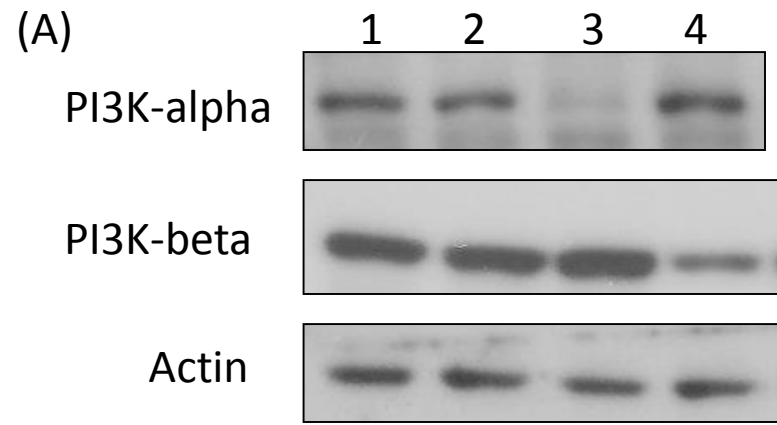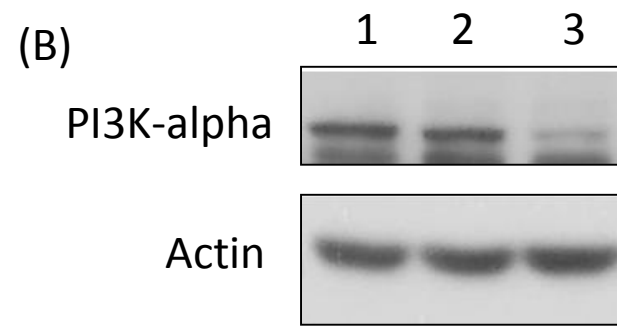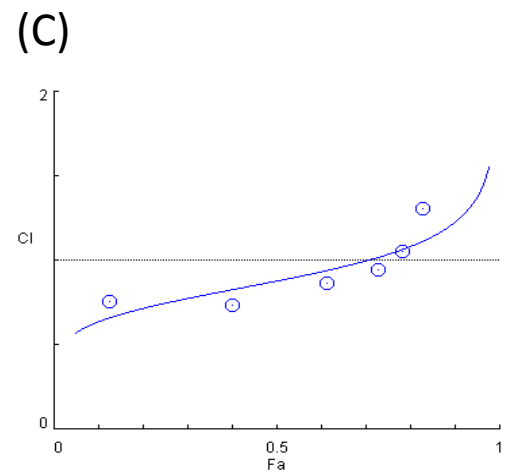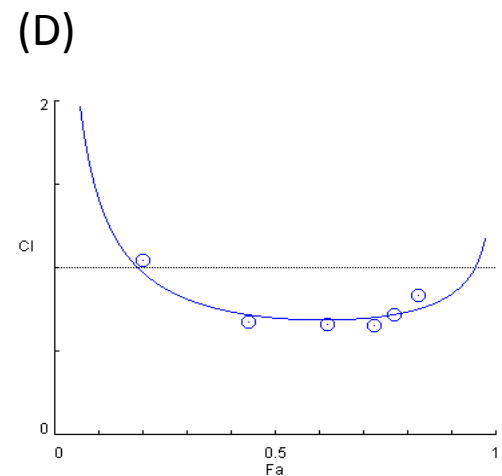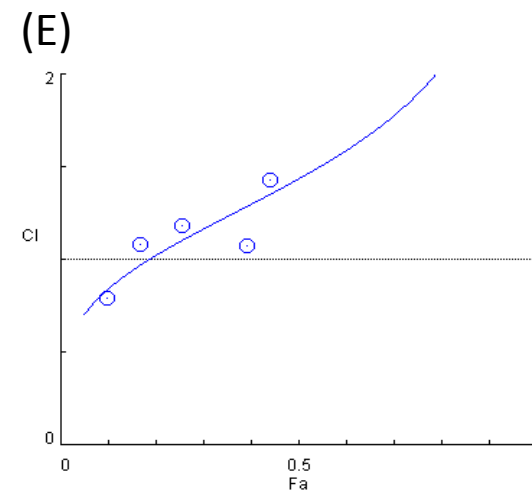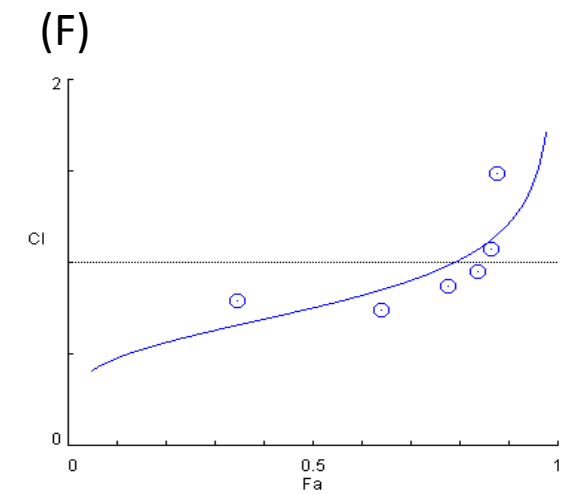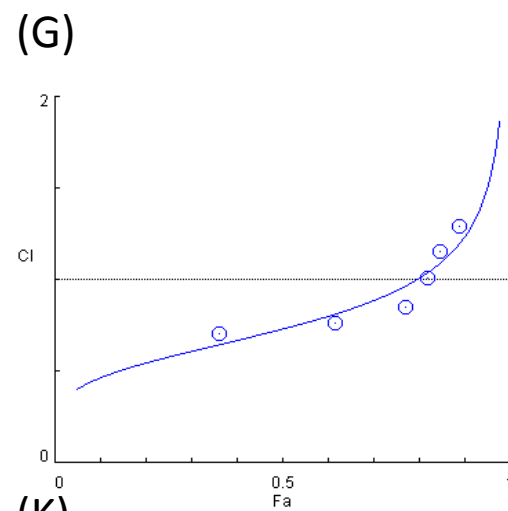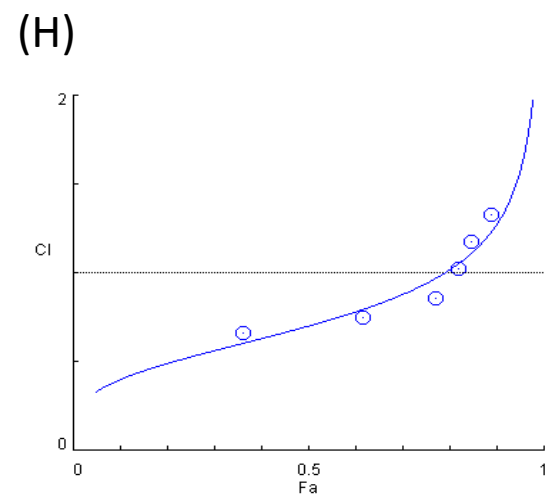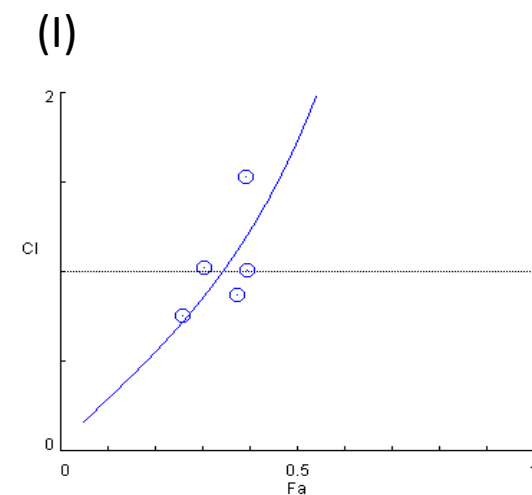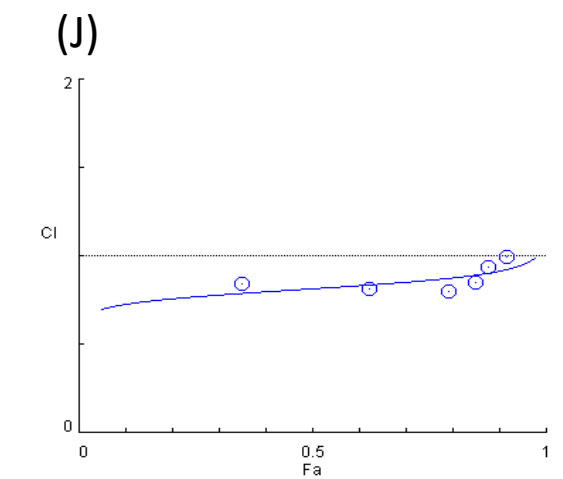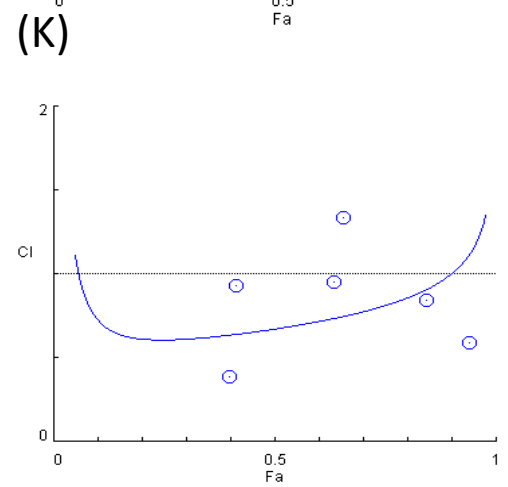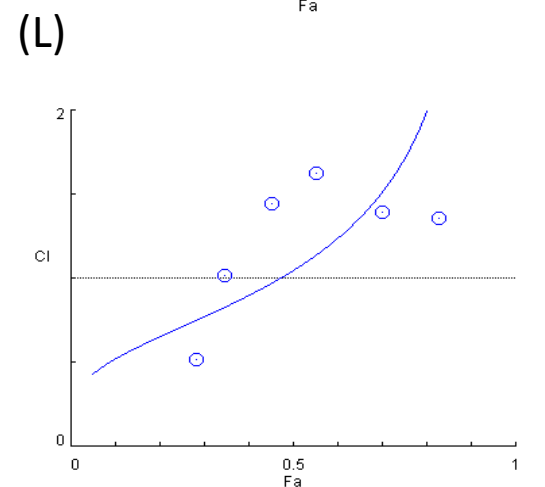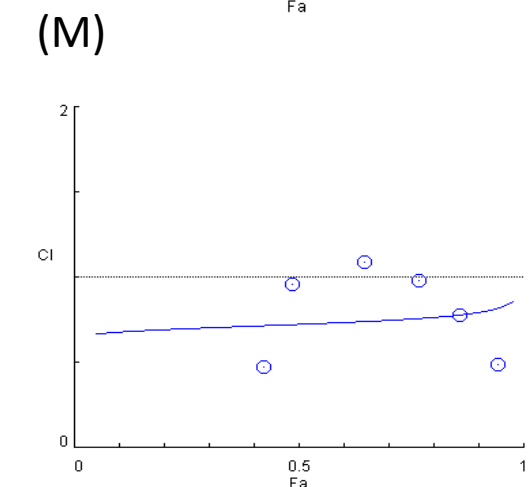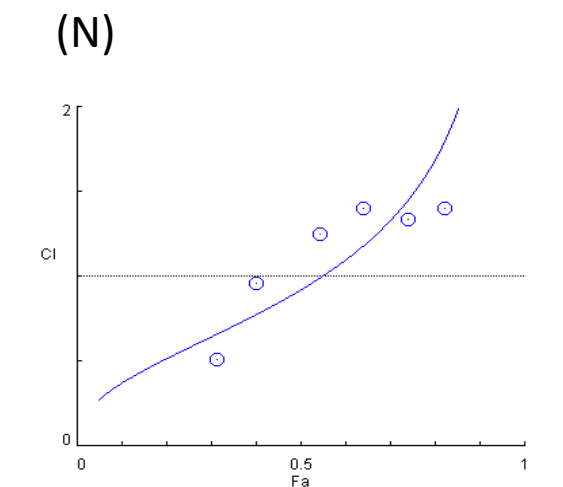



(A)

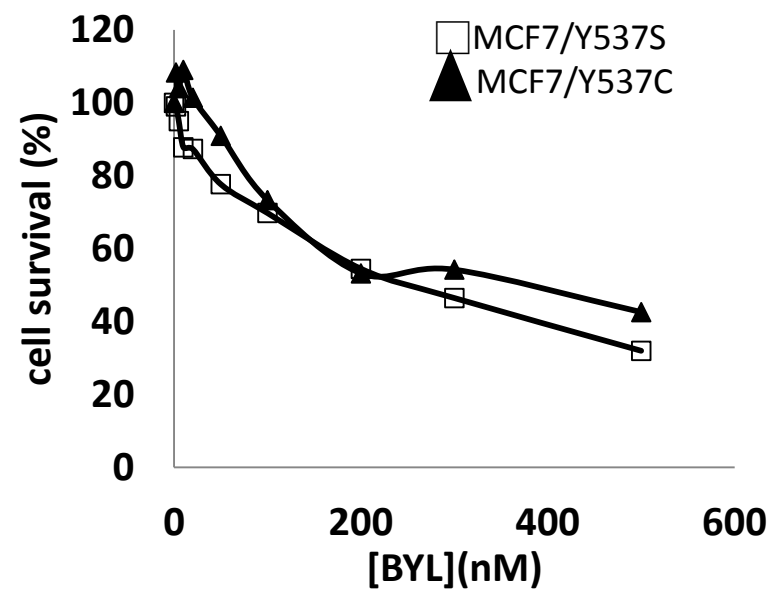

(B)

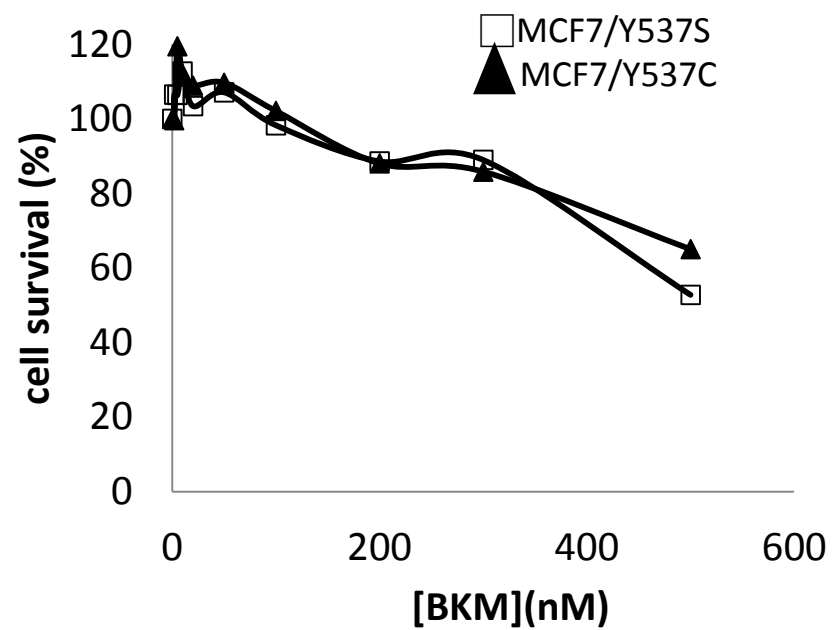

(C)

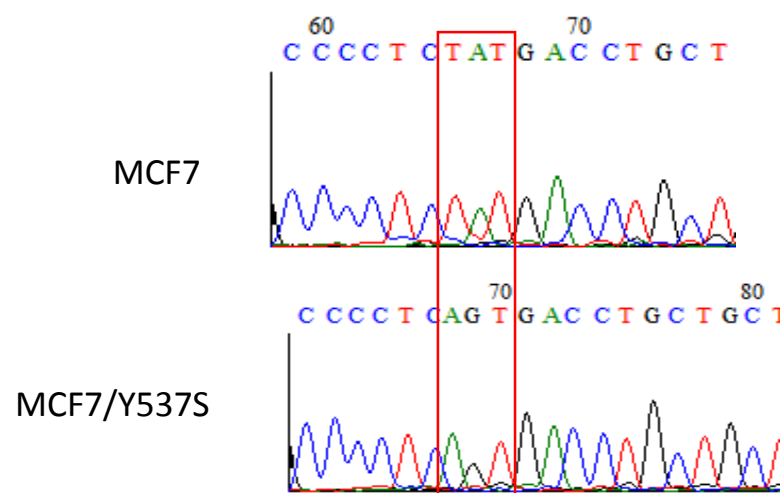

(D)

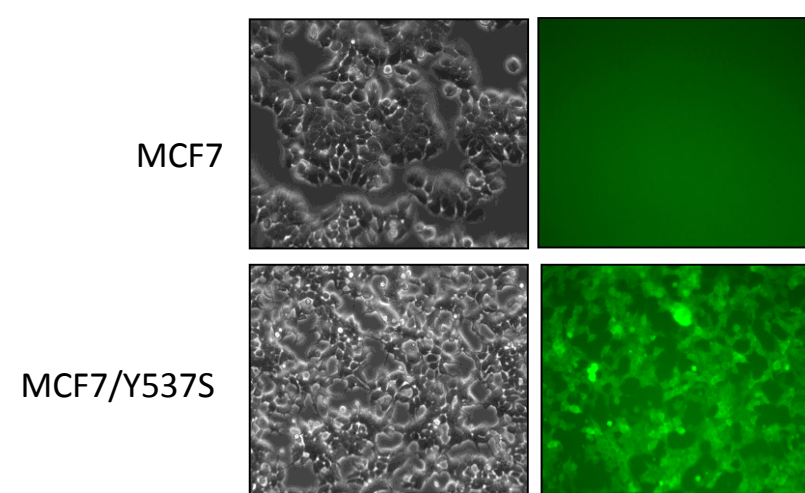

(E)

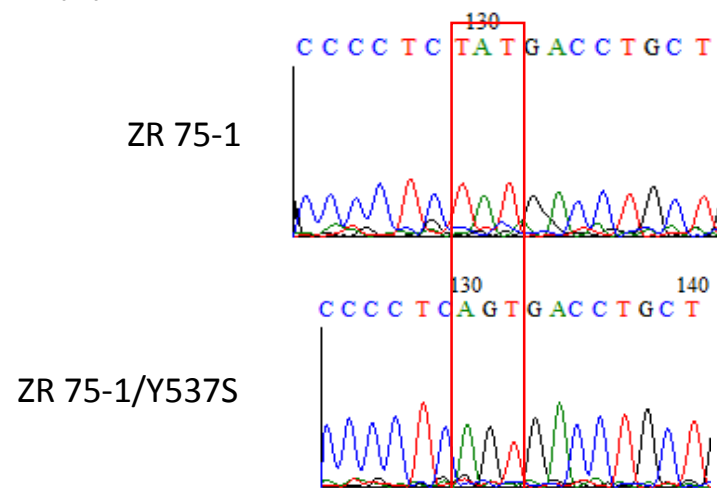

(F)

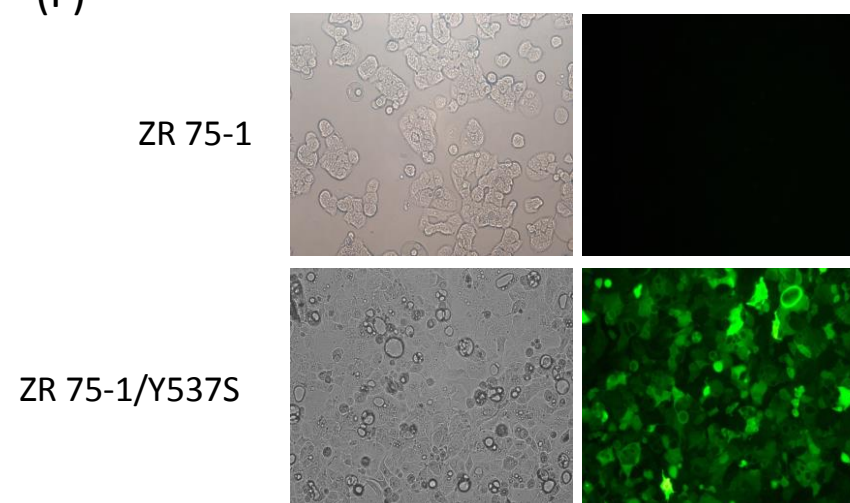

(A)

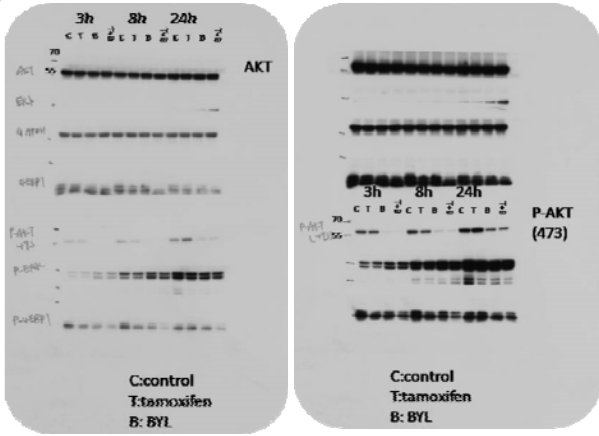

(B)

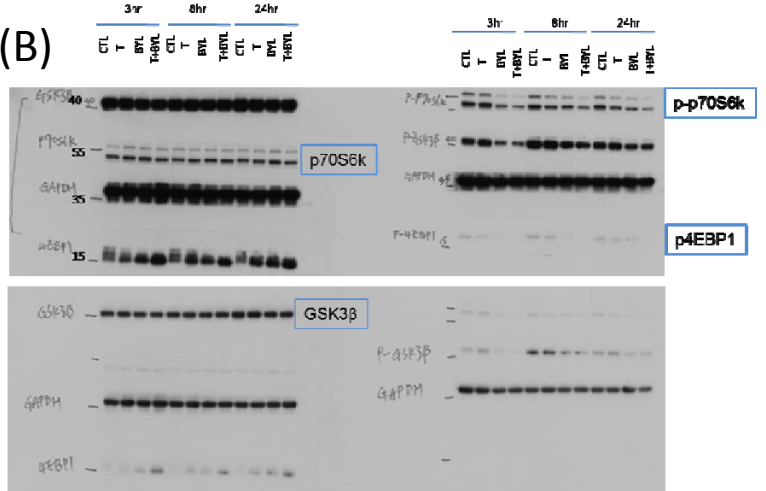

(C)

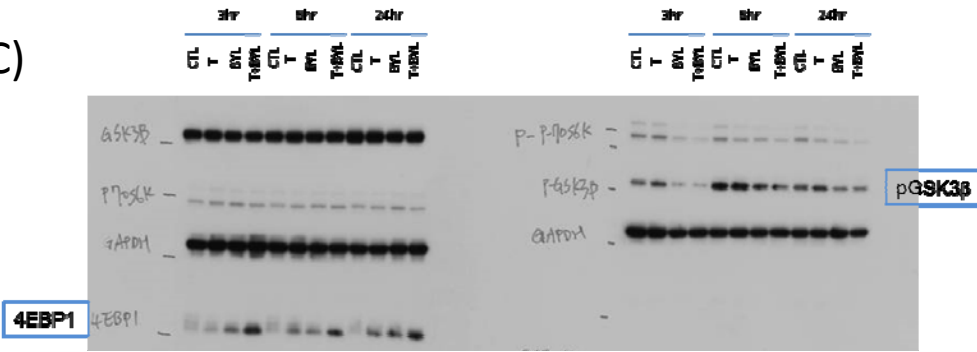

(D)

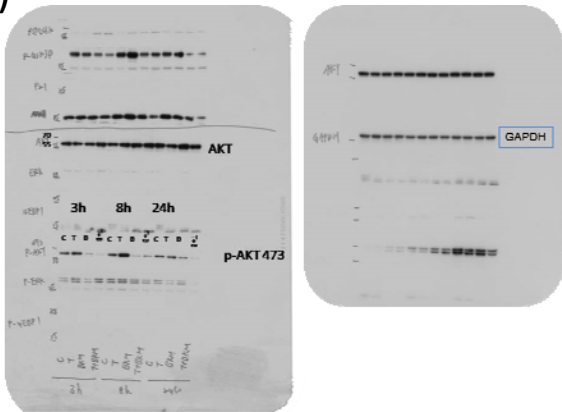

(E)

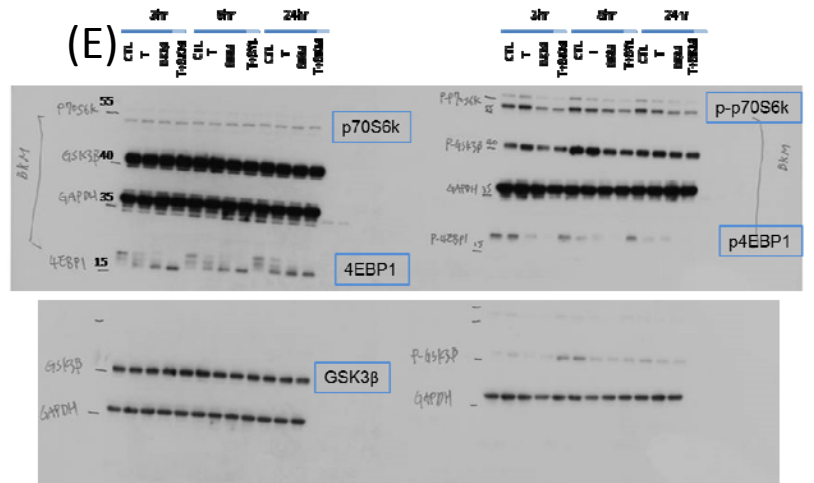

(F)

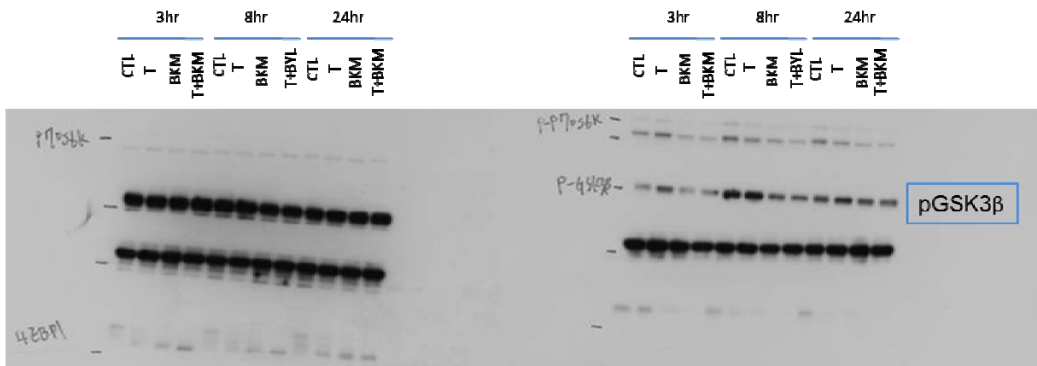

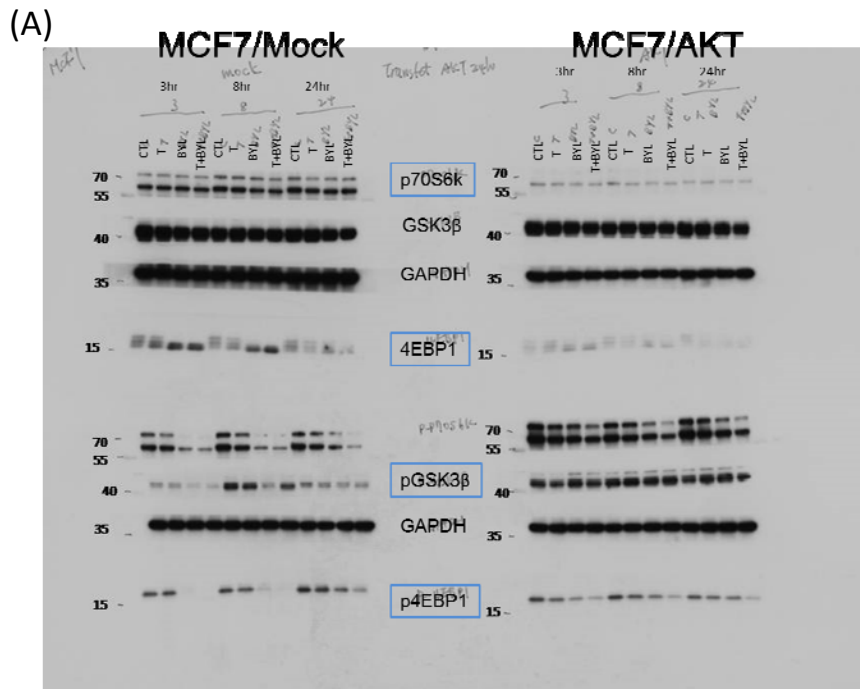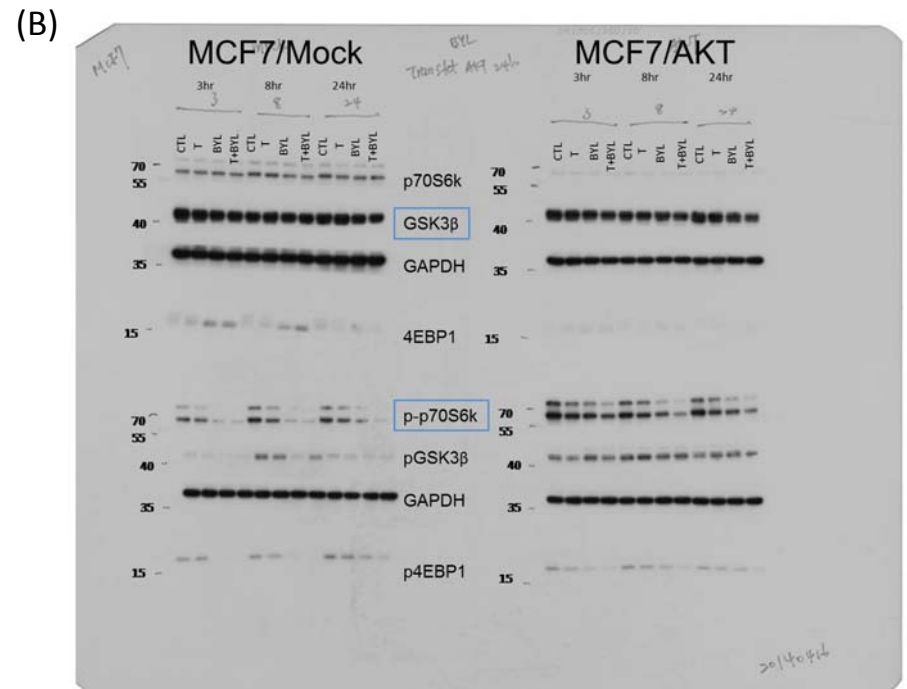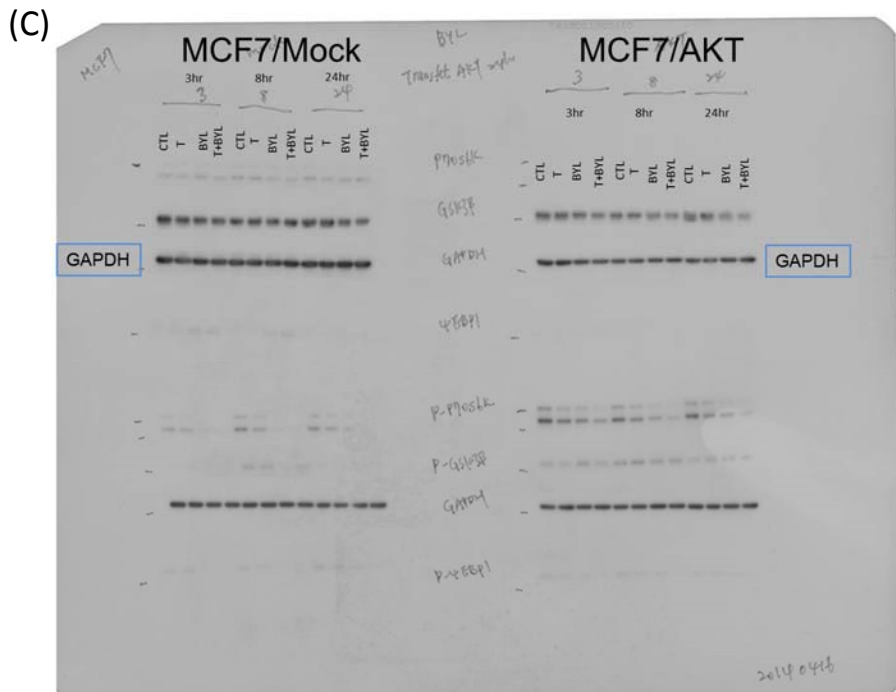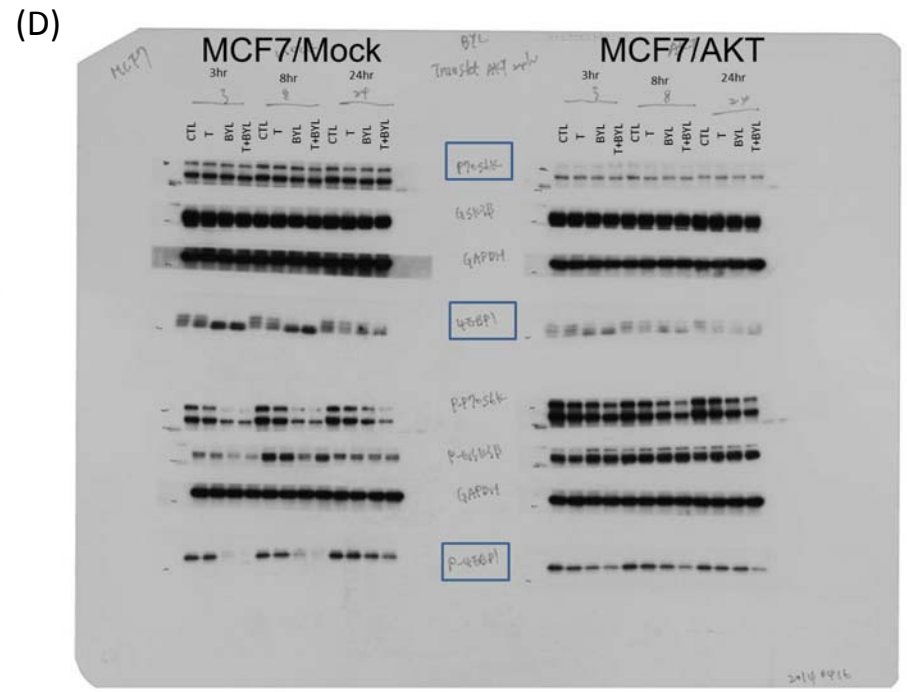

(A)

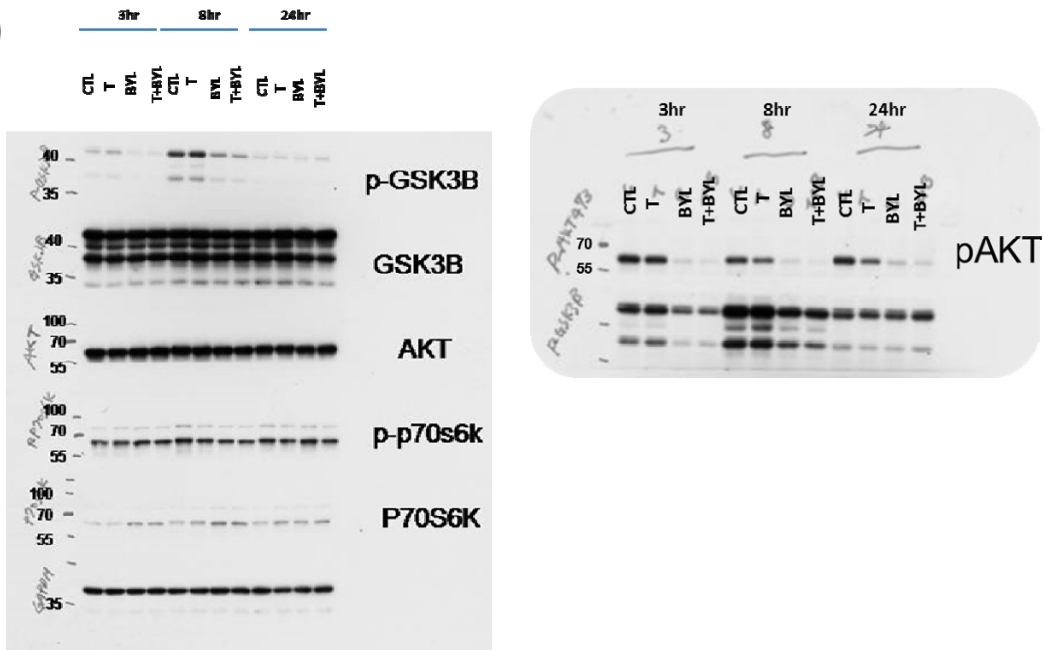

(B)

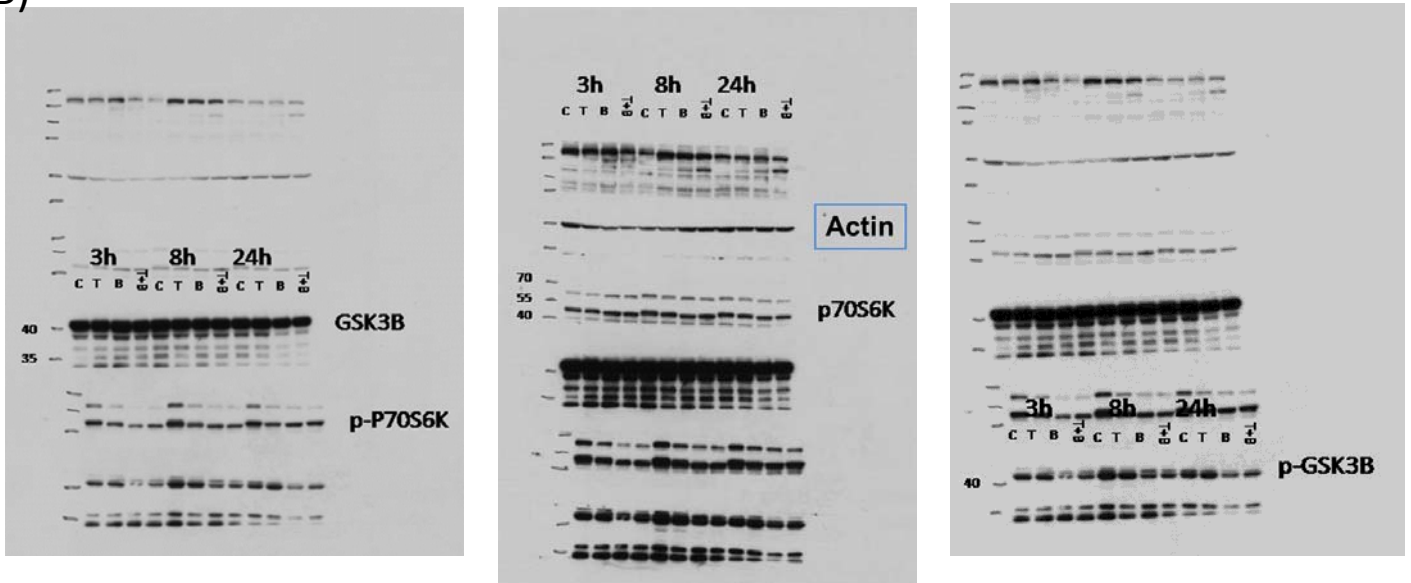

(C)

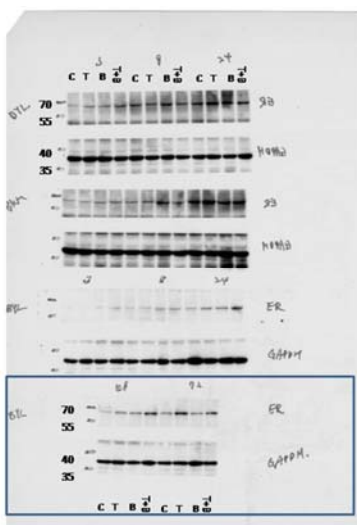

(D)

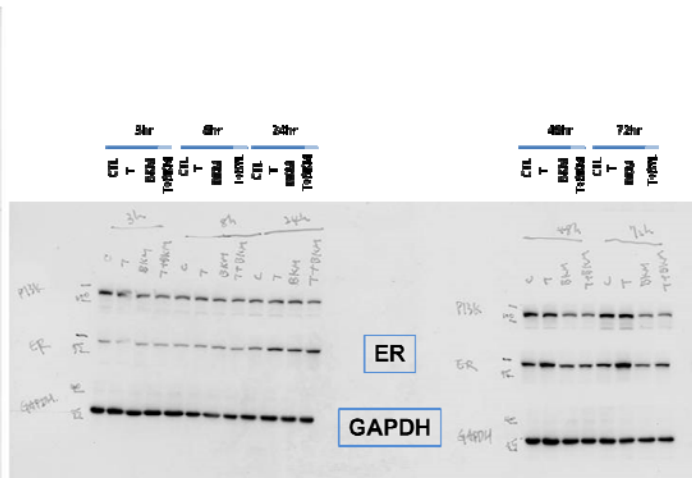

(A)

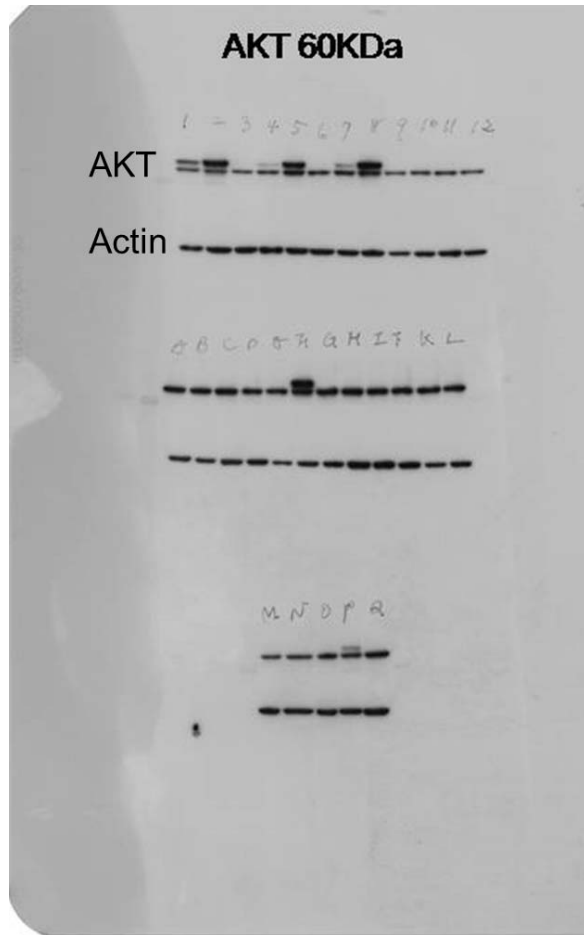

(B)

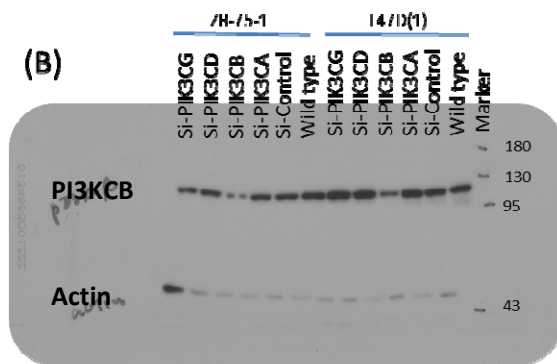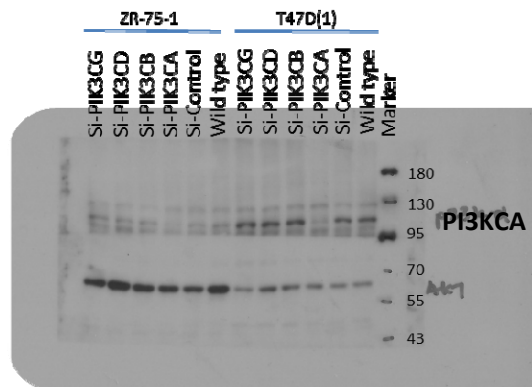

(C)

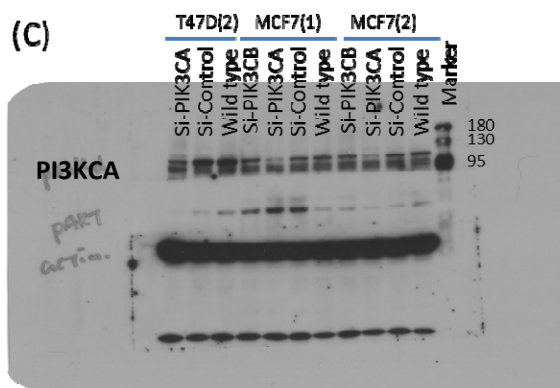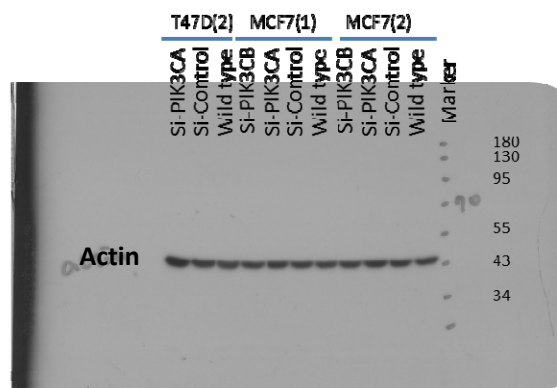

| p-value  | Control  | T        | BYL719   | BKM120   |
|----------|----------|----------|----------|----------|
| T        | 0.002199 |          |          |          |
| BYL719   | 0.102642 |          |          |          |
| BKM120   | 0.01985  |          |          |          |
| T+BYL719 | 0.000921 | 0.001334 | 0.000815 |          |
| T+BKM120 | 0.000666 | 0.000134 |          | 0.003286 |
